# Supplementary material for: The emergence of the tropical rainforest biome in the Cretaceous
Source: Copernicus journal article supplement (doi:10.5194/egusphere-2022-1246), 2022-12-05
Supplement: Supplementary file [file egusphere-2022-1246-AC1-supplement.pdf]

egusphere-2022-1246 | Journal relation: BG

Title: The emergence of the tropical rainforest biome in the Cretaceous

**Reply to comments (in blue):**

- All comments and annotated suggestions as well as linguistic and stylistic suggestions have been already taken into consideration and marked in a different blue colour in the revised MS.

- comes 24 I'm not familiar with the numbers given in the text.

This happened due to an unintended overlap between the text and line numbers.

- Did this author work on the Campanian palynology of Egypt? His/her publications are related to other disciplines rather than palynology.

Yes, but he introduced some ideas that are relevant to our work. To avoid any type of inconvenience, the reference (Wycisk, 1994) in the MS has been modified in the new version to (Wycisk, 1994 and references therein) to show that the obtained results were taken from his but also others' results.

- WHY is this reference abbreviated?

All references in the MS were updated in full and no more abbreviated.

- is that correct? or Australia.

Yes, it is correct and written as is in the original citation.

- This publication is not abbreviated, so please pay attention to all, either to abbreviate or edit in full.

Done as suggested.

- some of these line drawings are very faint. I recommend high-resolution line drawings, which make the plate a high-quality one.

This has been considered in the updated version.
